# Supplementary material
Source: publisher figshare collection journal article supplement (https://acs.figshare.com/ndownloader/files/7058051)
Supplement: Supplementary file 1 [file 7058051]

## Supporting Information for

### Confined formation of ultrathin ZnO nanorods/reduced graphene oxide mesoporous nanocomposites for high-performance room-temperature NO<sub>2</sub> sensors

Yi Xia<sup>a, b, #</sup>, Jing Wang<sup>a, c, #, \*</sup>, Jianlong Xu<sup>d</sup>, Xian Li<sup>e</sup>, Dan Xie<sup>e</sup>, Lan Xiang<sup>a, \*</sup>, Sridhar Komarneni<sup>c, \*</sup>

<sup>a</sup> Department of Chemical Engineering, Tsinghua University, Beijing, 100084, China

<sup>b</sup> Research Center for Analysis and Measurement, Kunming University of Science and Technology, Kunming 650093, China

<sup>c</sup> Department of Ecosystem Science and Management and Materials Research Institute, Materials Research Laboratory, The Pennsylvania State University, University Park, PA 16802, USA

<sup>d</sup> Institute of Functional Nano and Soft Materials (FUNSOM), Jiangsu Key Laboratory for Carbon-based Functional Materials and Devices, Soochow University, Suzhou, Jiangsu 215123, China

<sup>e</sup> Institute of Microelectronics, Tsinghua University, Beijing, 100084, China

---

# These two authors contributed equally.

\* Corresponding authors. Email: [wangjingflotu@gmail.com](mailto:wangjingflotu@gmail.com) (J. Wang); [xianglan@mail.tsinghua.edu.cn](mailto:xianglan@mail.tsinghua.edu.cn) (L. Xiang); [sxk7@psu.edu](mailto:sxk7@psu.edu) (S. Komarneni);

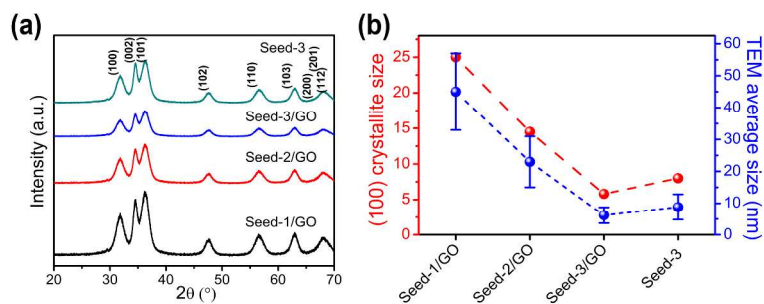

**Figure S1.** (a) XRD patterns of different nanoseeds; (b) summarized results of the calculated crystallite sizes from (100) diffraction peaks and the TEM observed average seed diameters.

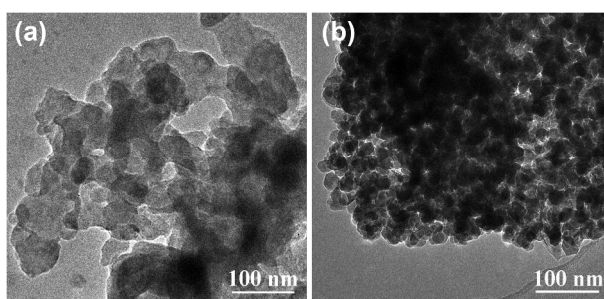

**Figure S2.** TEM images of the seed-1 (a) and seed-2 (b) formed in the absence of GO.

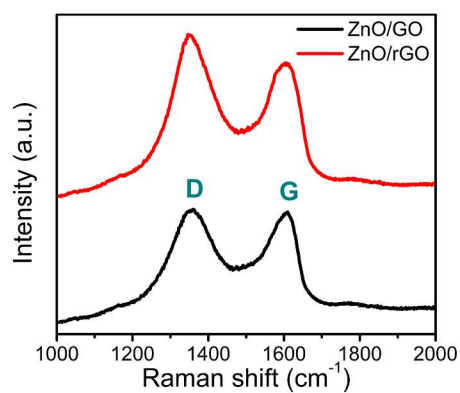

**Figure S3.** Raman spectra of ZnO nanoseeds/GO and ZnO nanorods/rGO.

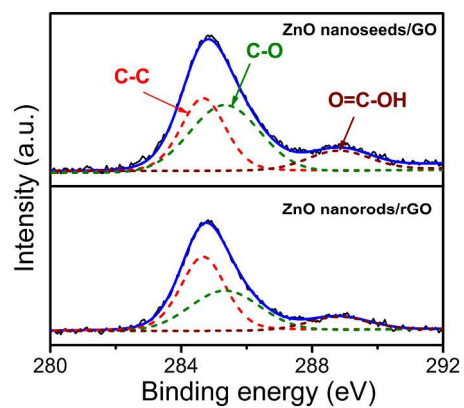

**Figure S4.** C 1s XPS spectra of ZnO nanoseeds/GO and ZnO nanorods/rGO.

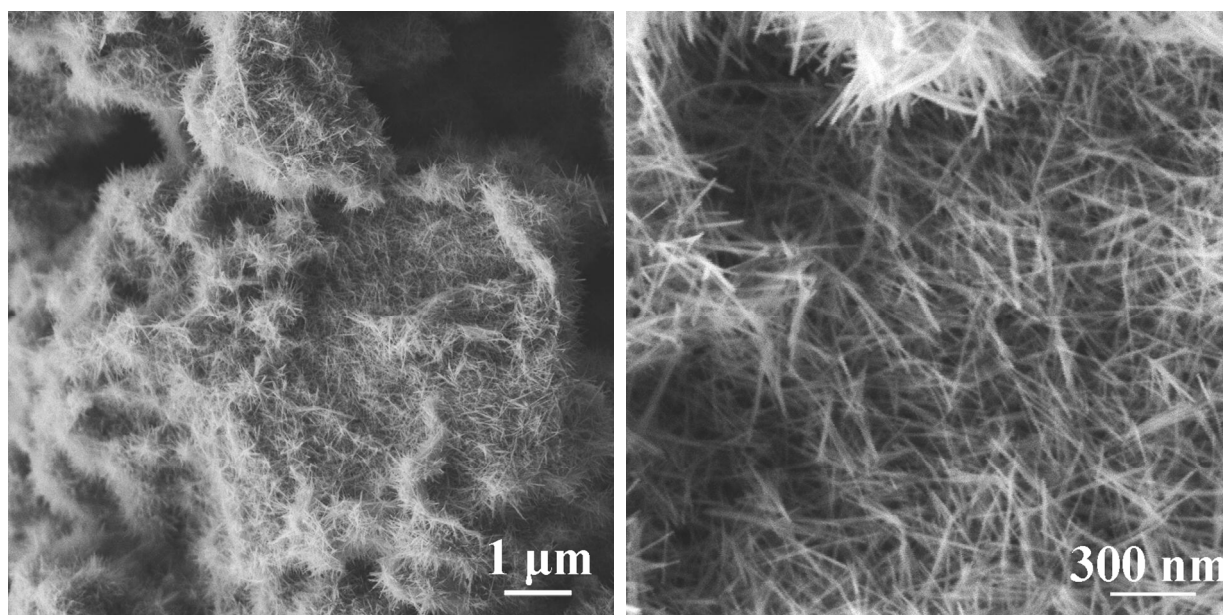

**Figure S5.** Enlarged Figure 2c and its inset.

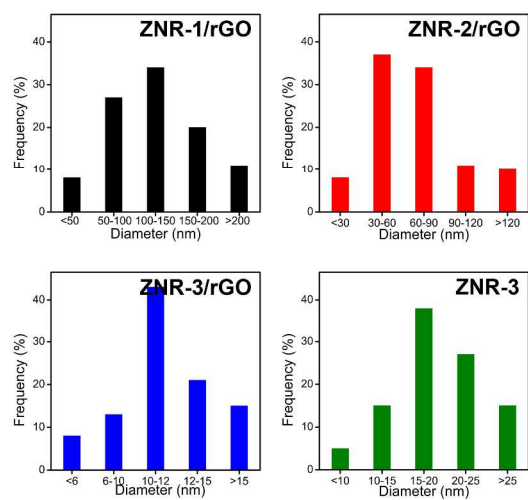

**Figure S6.** Diameter distributions of the nanorods in ZNR-1/rGO, ZNR-2/rGO, ZNR-3/rGO and ZNR-3.

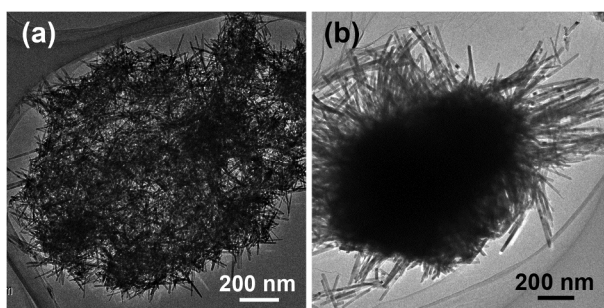

**Figure S7.** Low-magnification TEM images of ZNR-3/rGO (a) and ZNR-3 (b).

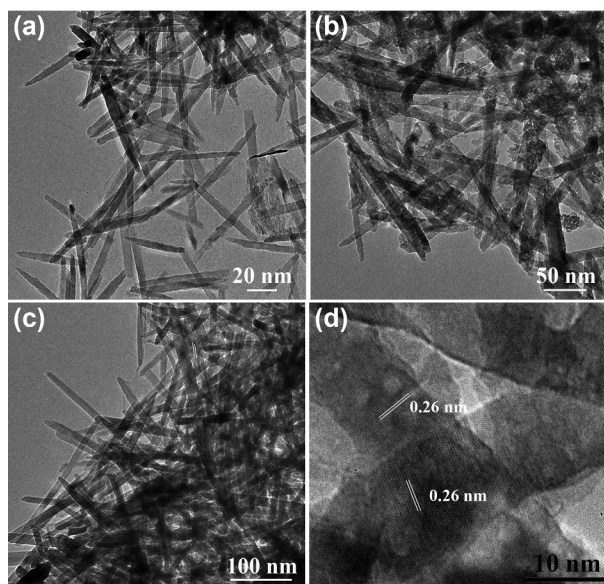

**Figure S8.** TEM and HRTEM images of ZNR-3/rGO at different reaction time (min). (a) 2; (b, d) 5 and (c) 10.

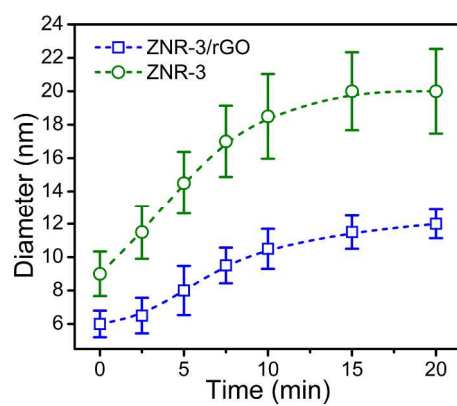

**Figure S9.** Variation of nanorod diameters during the growth of ZNR-3/rGO and ZNR-3.

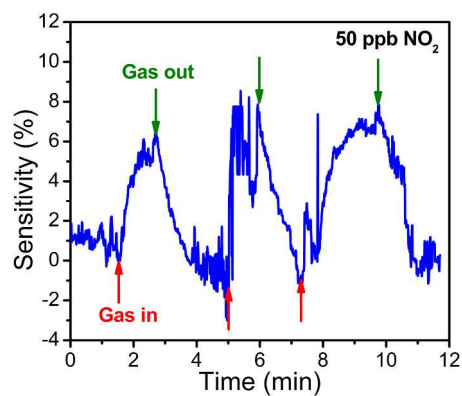

**Figure S10.** Dynamic response curve of the ZNR-3/rGO sensor to 50 ppb NO<sub>2</sub> for 3 cycles at 25 °C.

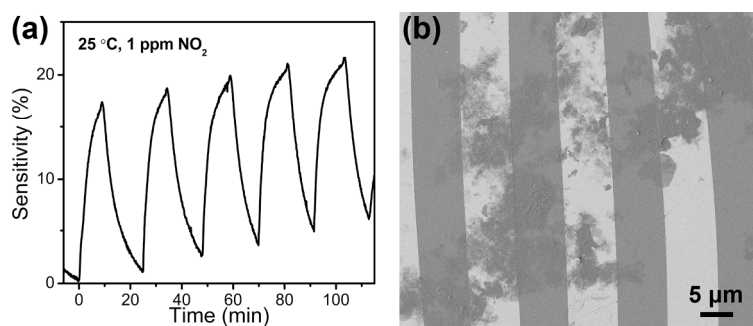

**Figure S11.** (a) Reproducibility of the rGO sensor to 1 ppm of NO<sub>2</sub>; (b) SEM image of the rGO sensor.

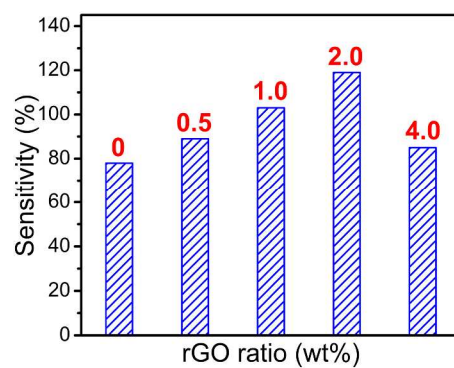

**Figure S12.** Effect of rGO ratio on the sensitivity of ZNR-3/rGO nanocomposites.

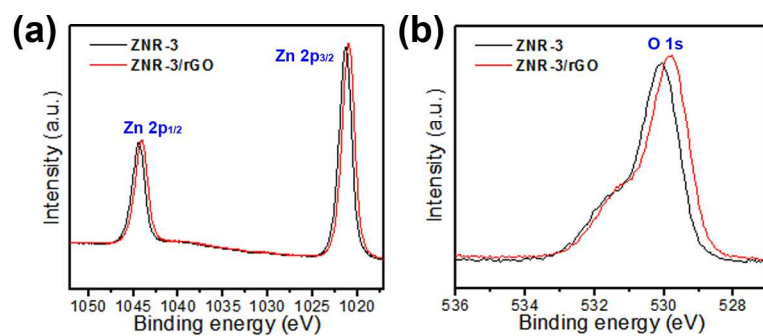

**Figure S13.** Zn 2p (a) and O 1s (b) XPS spectra of ZNR-3 and ZNR-3/rGO samples.
